# Supplementary material for: Variation of the Polyphenolic Composition and Antioxidant Capacity of Freshly Prepared Pomegranate Leaf Infusions over One-Day Storage
Source: MDPI journal article supplement (doi:10.3390/antiox10081187), 2021-07-26
Supplement: s1 [file s1]

---

**Variation of polyphenolic composition and antioxidant capacity of freshly prepared pomegranate leaf infusions over one-day storage**

**Manyou Yu <sup>a\*</sup>, Irene Gouvinhas <sup>a</sup>, Ana Barros <sup>a, b</sup>**

<sup>a</sup> Centre for the Research and Technology of Agro-Environmental and Biological Sciences (CITAB) / Inov4Agro (Institute for Innovation, Capacity Building and Sustainability of Agri-Food Production), University of Trás-os-Montes and Alto Douro (UTAD), 5000-801, Vila Real, Portugal. igouvinhas@utad.pt (Irene Gouvinhas)

<sup>b</sup> Department of Chemistry, School of Life Sciences and Environment, UTAD, Quinta de Prados; 5000-801, Vila Real, Portugal. abarros@utad.pt. (Ana Barros)

\* Correspondence: jiangymy518@163.com. (Manyou Yu)

**Captions**

**Table S1.** Identified compounds associated with the peaks of Figure S1.

**Table S2.** Factor loadings for illustrating the interpretation of Figure 3.

**Figure S1.** Representative RP-HPLC-DAD chromatogram (at 280 nm) of pomegranate leaf infusion during 0–24 h storage at room temperature.

**Table S1.** Identified compounds associated with the peaks of Figure S1.

| Peak No. | Identified Compounds               | Relevant References                                                                                                                       |
|----------|------------------------------------|-------------------------------------------------------------------------------------------------------------------------------------------|
| 1        | Gallic acid                        | Li, <i>et al.</i> [1]; Li, <i>et al.</i> [2]; Swilam and Nematallah [3];                                                                  |
| 2        | Flavan-3-ols                       | de Oliveira, <i>et al.</i> [4]; Lansky and Newman [5];                                                                                    |
| 3        | Punicalin (A+B)                    | Pinheiro, <i>et al.</i> [6]; Tanaka, <i>et al.</i> [7]; Li, <i>et al.</i> [2]                                                             |
| 4        | Ellagic acid derivative            | Pinheiro, <i>et al.</i> [6]; Marques, <i>et al.</i> [8]; Acquadro, <i>et al.</i> [9]                                                      |
| 5        | Ellagitannin I                     | Pinheiro, <i>et al.</i> [6]                                                                                                               |
| 6        | Flavanone glycoside I              | Heber, <i>et al.</i> [10]; Srivastava, <i>et al.</i> [11]                                                                                 |
| 7        | Ellagitannin II                    | Gil, <i>et al.</i> [12]                                                                                                                   |
| 8        | Ellagitannin III (galloyl-glucose) | Gil, <i>et al.</i> [12]; Pinheiro, <i>et al.</i> [6]; Nawwar, <i>et al.</i> [13]; Acquadro, <i>et al.</i> [9]; Swilam and Nematallah [3]; |
| 9        | Ellagitannin IV (punicalagin A)    | Gil, <i>et al.</i> [12]; Çam and Hışıl [14]; Russo, <i>et al.</i> [15]; Swilam and Nematallah [3]                                         |
| 10       | Flavonol glycoside                 | Pinheiro, <i>et al.</i> [6]; Marques, <i>et al.</i> [8]; de Oliveira, <i>et al.</i> [4]                                                   |
| 11       | Ellagitannin V                     | Pinheiro, <i>et al.</i> [6]                                                                                                               |
| 12       | Ellagitannin VI                    | Russo, <i>et al.</i> [15]                                                                                                                 |
| 13       | Ellagitannin VII (punicalagin B)   | Çam and Hışıl [14]; Fischer, <i>et al.</i> [16]; Russo, <i>et al.</i> [15]                                                                |
| 14       | Ellagitannin VIII                  | Fischer, <i>et al.</i> [16]                                                                                                               |
| 15       | Ellagic acid                       | Wang, <i>et al.</i> [17]; Li, <i>et al.</i> [1]; Çam and Hışıl [14]; Li, <i>et al.</i> [2]; Acquadro, <i>et al.</i> [9]                   |
| 16       | Ellagitannin IX                    | Fischer, <i>et al.</i> [16]                                                                                                               |
| 17       | Flavanone glycoside II             | Heber, <i>et al.</i> [10]; Srivastava, <i>et al.</i> [11];                                                                                |
| 18       | Apigenin glycoside                 | Nawwar, <i>et al.</i> [18]; Acquadro, <i>et al.</i> [9]                                                                                   |
| 19       | Luteolin glycoside I               | Nawwar, <i>et al.</i> [18]; Acquadro, <i>et al.</i> [9]                                                                                   |
| 20       | Luteolin glycoside II              | Nawwar, <i>et al.</i> [18]; Acquadro, <i>et al.</i> [9]                                                                                   |

**Table S2.** Factor loadings for illustrating the interpretation of Figure 3.

| <b>Factor No.</b> | <b>Factors</b>                     | <b>PC 1</b> | <b>PC 2</b> |
|-------------------|------------------------------------|-------------|-------------|
| 1                 | Gallic acid                        | -0.011      | 0.034       |
| 2                 | Flavan-3-ols                       | 0.024       | 0.016       |
| 3                 | Punicalin (A+B)                    | -0.030      | 0.005       |
| 4                 | Ellagic acid derivative            | 0.011       | -0.010      |
| 5                 | Ellagitannin I                     | -0.011      | 0.031       |
| 6                 | Ellagitannin II                    | -0.039      | 0.073       |
| 7                 | Ellagitannin III (galloyl-glucose) | 0.081       | -0.132      |
| 8                 | Ellagitannin IV (punicalagin A)    | 0.635       | 0.115       |
| 9                 | Flavonol glycoside                 | -0.075      | 0.127       |
| 10                | Ellagitannin V                     | -0.260      | 0.596       |
| 11                | Ellagitannin VI                    | 0.139       | -0.208      |
| 12                | Ellagitannin VII (punicalagin B)   | 0.580       | 0.497       |
| 13                | Ellagitannin VIII                  | 0.079       | -0.010      |
| 14                | Ellagic acid                       | -0.098      | 0.402       |
| 15                | Ellagitannin IX                    | -0.017      | 0.041       |
| 16                | Apigenin glycoside                 | -0.073      | 0.195       |
| 17                | Luteolin glycoside I               | -0.013      | 0.034       |
| 18                | Luteolin glycoside II              | -0.006      | 0.018       |
| 19                | ABTS scavenging activity           | 0.002       | -0.002      |
| 20                | DPPH scavenging activity           | 0.003       | 0.001       |
| 21                | FRAP ferric reducing power         | 0.004       | -0.002      |
| 22                | Total phenols                      | 0.041       | -0.044      |
| 23                | <i>Ortho</i> -diphenols            | 0.093       | 0.094       |
| 24                | Total flavonoids                   | 0.047       | -0.026      |
| 25                | Condensed tannins                  | 0.352       | -0.294      |

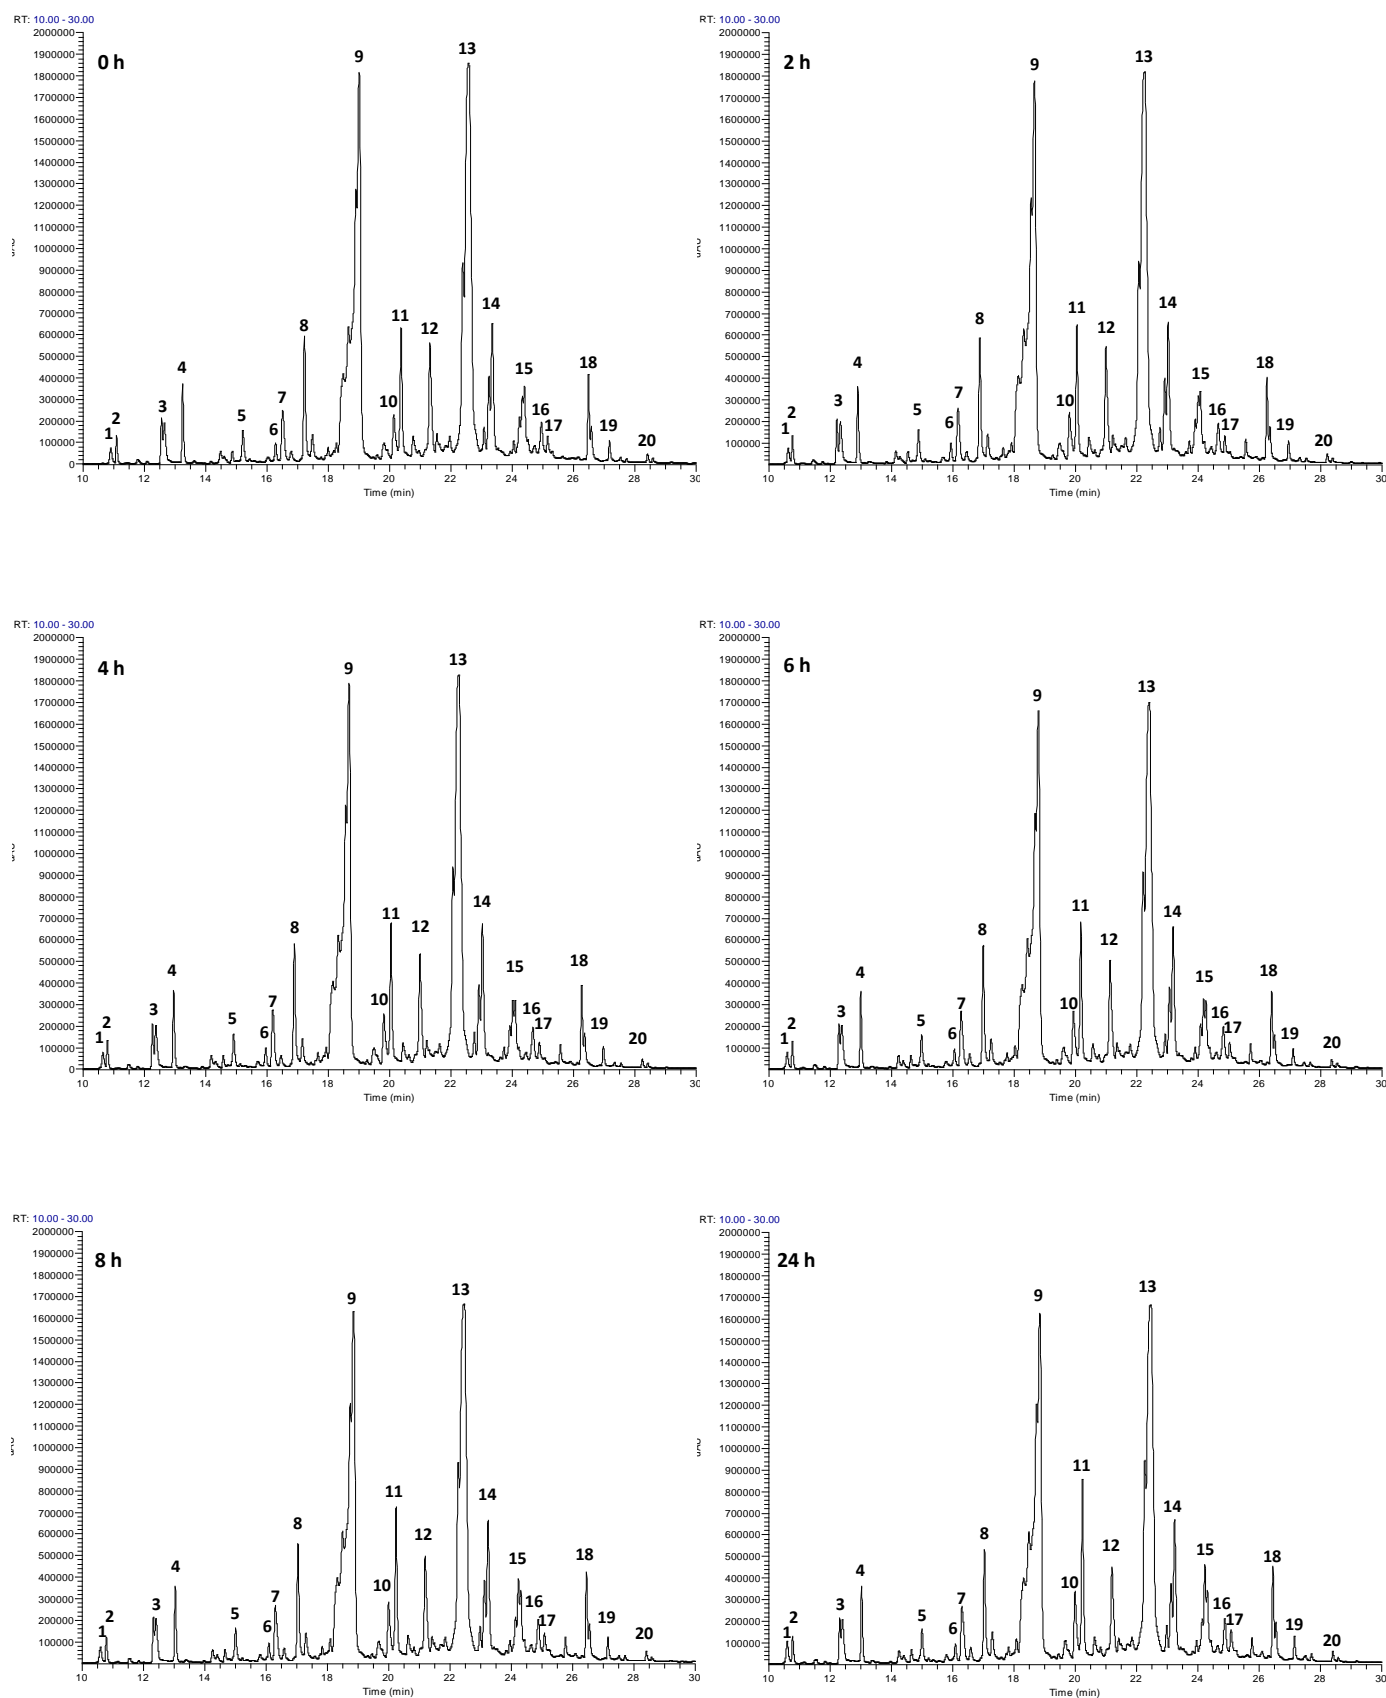

**Figure S1.** Representative RP-HPLC-DAD chromatogram (at 280 nm) of pomegranate leaf infusion during 0–24 h storage at room temperature.

---

## References:

1. Li, J.; Wang, G.; Hou, C.; Li, J.; Luo, Y.; Li, B. Punicalagin and ellagic acid from pomegranate peel induce apoptosis and inhibits proliferation in human HepG2 hepatoma cells through targeting mitochondria. *Food Agric. Immunol.* **2019**, *30*, 897-912, doi:10.1080/09540105.2019.1642857.
2. Li, R.; Chen, X.G.; Jia, K.; Liu, Z.P.; Peng, H.Y. A systematic determination of polyphenols constituents and cytotoxic ability in fruit parts of pomegranates derived from five Chinese cultivars. *SpringerPlus* **2016**, *5*, 914, doi:10.1186/s40064-016-2639-x.
3. Swilam, N.; Nematallah, K.A. Polyphenols profile of pomegranate leaves and their role in green synthesis of silver nanoparticles. *Sci. Rep.* **2020**, *10*, 14851, doi:10.1038/s41598-020-71847-5.
4. de Oliveira, J.F.F.; Garreto, D.V.; da Silva, M.C.P.; Fortes, T.S.; de Oliveira, R.B.; Nascimento, F.R.F.; Da Costa, F.B.; Grisotto, M.A.G.; Nicolete, R. Therapeutic potential of biodegradable microparticles containing *Punica granatum* L. (pomegranate) in murine model of asthma. *Inflamm. Res.* **2013**, *62*, 971-980, doi:10.1007/s00011-013-0659-3.
5. Lansky, E.P.; Newman, R.A. *Punica granatum* (pomegranate) and its potential for prevention and treatment of inflammation and cancer. *J. Ethnopharmacol.* **2007**, *109*, 177-206, doi:10.1016/j.jep.2006.09.006.
6. Pinheiro, A.J.M.C.R.; Gonçalves, J.S.; Dourado, Á.W.A.; de Sousa, E.M.; Brito, N.M.; Silva, L.K.; Batista, M.C.A.; de Sá, J.C.; Monteiro, C.R.A.V.; Fernandes, E.S.; et al. *Punica granatum* L. Leaf Extract Attenuates Lung Inflammation in Mice with Acute Lung Injury. *J. Immunol. Res.* **2018**, *2018*, 6879183, doi:10.1155/2018/6879183.
7. Tanaka, T.; Nonaka, G.-I.; Nishioka, I. Tannins and Related Compounds. XL.: Revision of the Structures of Punicalin and Punicalagin, and Isolation and Characterization of 2-O-Galloylpunicalin from the Bark of *Punica granatum* L. *Chem. Pharm. Bull.* **1986**, *34*, 650-655, doi:10.1248/cpb.34.650.
8. Marques, L.C.; Pinheiro, A.J.; Araújo, J.G.; de Oliveira, R.A.; Silva, S.N.; Abreu, I.C.; de Sousa, E.M.; Fernandes, E.S.; Luchessi, A.D.; Silbiger, V.N. Anti-inflammatory effects of a pomegranate leaf extract in LPS-induced peritonitis. *Planta Med.* **2016**, *82*, 1463-1467, doi:10.1055/s-0042-108856.
9. Acquadro, S.; Civra, A.; Cagliero, C.; Marengo, A.; Rittà, M.; Francese, R.; Sanna, C.; Berteau, C.; Sgorbini, B.; Lembo, D. *Punica granatum* Leaf Ethanolic Extract and Ellagic Acid as Inhibitors of Zika Virus Infection. *Planta Med.* **2020**, *86*, 1363-1374, doi:10.1055/a-1232-5705.
10. Heber, D.; Schulman, R.N.; Seeram, N.P. *Pomegranates: ancient roots to modern medicine*, 1st ed.; Taylor & Francis CRC press: Boca Raton, FL, USA, 2006.
11. Srivastava, R.; Chauhan, D.; Chauhan, J. A flavonoid diglycoside from *Punica granatum*. *Pharm. Biol.* **2001**, *39* (2): 155-157, doi:10.1076/phbi.39.2.155.6254.
12. Gil, M.I.; Tomás-Barberán, F.A.; Hess-Pierce, B.; Holcroft, D.M.; Kader, A.A. Antioxidant Activity of Pomegranate Juice and Its Relationship with Phenolic Composition and Processing. *J. Agric. Food Chem.* **2000**, *48*, 4581-4589, doi:10.1021/jf000404a.
13. Nawwar, M.A.M.; Hussein, S.A.M.; Merfort, I. NMR spectral analysis of polyphenols from *Punica granatum*. *Phytochemistry* **1994**, *36*, 793-798, doi:10.1016/S0031-9422(00)898 20-9.
14. Çam, M.; Hışıl, Y. Pressurised water extraction of polyphenols from pomegranate peels. *Food Chem.* **2010**, *123*, 878-885, doi:10.1016/j.foodchem.2010.05.011.

- 
15. Russo, M.; Fanali, C.; Tripodo, G.; Dugo, P.; Muleo, R.; Dugo, L.; De Gara, L.; Mondello, L. Analysis of phenolic compounds in different parts of pomegranate (*Punica granatum*) fruit by HPLC-PDA-ESI/MS and evaluation of their antioxidant activity: application to different Italian varieties. *Anal. Bioanal. Chem.* **2018**, *410*, 3507-3520, doi:10.1007/s00216-018-0854-8.
  16. Fischer, U.A.; Carle, R.; Kammerer, D.R. Identification and quantification of phenolic compounds from pomegranate (*Punica granatum* L.) peel, mesocarp, aril and differently produced juices by HPLC-DAD-ESI/MSn. *Food Chem.* **2011**, *127*, 807-821, doi:10.1016/j.foodchem.2010.12.156.
  17. Wang, C.; Shi, L.; Fan, L.; Ding, Y.; Zhao, S.; Liu, Y.; Ma, C. Optimization of extraction and enrichment of phenolics from pomegranate (*Punica granatum* L.) leaves. *Ind. Crops Prod.* **2013**, *42*, 587-594, doi:10.1016/j.indcrop.2012.06.031.
  18. Nawwar, M.A.M.; Hussein, S.A.M.; Merfort, I. Leaf phenolics of *Punica granatum*. *Phytochemistry* **1994**, *37*, 1175-1177, doi:10.1016/S0031-9422(00)89552-7.
